# Supplementary material for: A Target-Disease Network Model of Second-Generation BCR-ABL Inhibitor Action in Ph+ ALL
Source: PubMed Central journal article supplement (PMC3795025; doi:10.1371/journal.pone.0077155), 2013-10-10
Supplement: pone.0077155.s001.pdf [file pone.0077155.s001.pdf]

## Supplementary Information

### A target-disease network model of second-generation BCR-ABL inhibitor action in Ph+ ALL

Uwe Rix<sup>1¶</sup>, Jacques Colinge<sup>1\*</sup>, Katharina Blatt<sup>2</sup>, Manuela Gridling<sup>1</sup>, Lily L. Remsing Rix,<sup>1¶</sup> Katja Parapatics<sup>1</sup>, Sabine Cerny-Reiterer<sup>2,3</sup>, Thomas R. Burkard<sup>1#</sup>, Ulrich Jäger<sup>2</sup>, Junia V. Melo<sup>4</sup>, Keiryn L. Bennett<sup>1</sup>, Peter Valent<sup>2,3</sup> and Giulio Superti-Furga<sup>1</sup>

<sup>1</sup>CeMM – Research Center for Molecular Medicine of the Austrian Academy of Sciences, Vienna, Austria; <sup>2</sup>Department of Internal Medicine I, Division of Hematology and Hemostaseology, Medical University of Vienna, Vienna, Austria; <sup>3</sup>Ludwig Boltzmann Cluster Oncology, Vienna, Austria; <sup>4</sup>Department of Haematology, SA Pathology Centre for Cancer Biology, Adelaide, Australia

\*These two authors contributed equally

¶Current address: H. Lee Moffitt Cancer Center & Research Institute, Tampa, FL, USA

#Current address: IMBA - Institute for Molecular Biotechnology of the Austrian Academy of Sciences, Vienna, Austria

**Figure S1. ABL *in vitro* kinase assay. A.** Chemical structures of nilotinib, pc-nilotinib and c-nilotinib and synthetic modification of pc-nilotinib generating c-nilotinib. Boc-Gly-OH: *N*-(*tert*-Butoxycarbonyl)glycine, DCC: *N,N'*-Dicyclohexylcarbodiimide, DMAP: 4-(Dimethylamino)pyridine, TFA: Trifluoroacetic acid. **B.** *In vitro* kinase inhibition assay of nilotinib and pre-c-nilotinib (pc-nilotinib), the non-esterified precursor of c-nilotinib, using recombinant full-length c-ABL determines similarly potent inhibition of ABL by nilotinib and pc-nilotinib.

**Figure S2. Ph+ ALL-specific kinome-wide drug-target maps of nilotinib, dasatinib, bosutinib and bafetinib displaying new and known targets.** Ph+ ALL kinase targets of the TKI nilotinib (A), dasatinib (B), bosutinib (C) and bafetinib (D) that have been identified in this study were mapped to the phylogenetic tree of human protein kinases. Known kinase targets of the respective drugs are shown in blue, new targets in grey. Color intensities indicate the degree of amino acid (aa) sequence

coverage observed for each protein. A black dotted rim indicates independent validation by various *in vitro* assays that have been reported previously, a red dotted rim indicates validation of drug-protein interactions performed in the course of this study (see Table S4 in this file), selecting the most prominent kinase targets (based on the aa sequence coverage) without previous independent validation. The Human Kinome Map was adapted with permission from Cell Signaling Technology ([www.cellsignal.com](http://www.cellsignal.com)).

**Figure S3. Hybrid drug-protein/protein-protein interaction networks of specific dasatinib binding proteins in the patient pool sample.** The primary cellular target profile of dasatinib (red) was overlaid with PPI data from public databases. Protein kinases were considered to be direct drug binders (solid lines) and displayed in red. All other non-kinase proteins were assumed to be indirect binders (dashed lines) and are displayed in grey.

**Figure S4. Measurement of <sup>3</sup>H-thymidine uptake in BV-173 cells.**

**Figure S5. Measurement of <sup>3</sup>H-thymidine uptake in Z-119 cells.**

**Figure S6 Measurement of <sup>3</sup>H-thymidine uptake in SUP-B15 cells.**

**Figure S7. Measurement of cell apoptosis in BV-173 and Z-119 cells.**

**Table S1. Molecular Characteristics of patient samples.** WBC: White blood cell count; Hb: Hemoglobin; Plt: Platelet count.

**Table S2. Mass spectrometry data for drug affinity pulldowns in BV-173 cells.** AC: Swissprot accession code. Entrez-ID: Entrez accession code. Entrez\_GN: alternative gene names. PC: number of unique peptides (peptide count). SC: number of mass spectra to sequence matches (spectral count). SeqCov: percentage (1.00=100%) of amino acid sequence for individual protein that is cumulatively covered by all assigned unique peptides (sequence coverage). Numbers following drug names are indicating the individual replicates (1,2: technical replicates of experimental replicate 1; 3,4: technical replicates of experimental replicate 2). 'grp' indicates the overall peptide counts, spectral

counts or sequence coverage across all replicates. Each row represents one group of proteins, the representative of which is listed in detail.

**Table S3. Mass spectrometry data for drug affinity pulldowns in Z-119 cells.** For detailed description see Table S2 in this file.

**Table S4. Mass spectrometry data for dasatinib affinity pulldowns in primary cells from Ph+ ALL patient pool.** For detailed description see Table S2 in this file.

**Table S5. IC<sub>50</sub> values (in nM) of selected new drug-kinase interactions determined by *in vitro* kinase assays.**

**Table S6. Mass spectrometry data for competitive drug affinity pulldowns in BV-173 cells.** Competition was performed with concomitant incubation of drug beads with the respective original drug at a concentration of 20 µM. For detailed description see Table S3 in this file.

**Table S7. Mass spectrometry data for competitive drug affinity pulldowns in Z-119 cells.** Competition was performed with concomitant incubation of drug beads with the respective original drug at a concentration of 20 µM. For detailed description see Table S3 in this file.

**Table S8. Eluate abundance scores A for each specific drug-binding protein identified in BV-173 cells.** AC: Swissprot accession code. ID: Uniprot identifier. Individual scores were calculated as the product of the mean spectral count and the 'grp' sequence coverage extracted from Table S3 in this file.

**Table S9. Eluate abundance scores A for each specific drug-binding protein identified in Z-119 cells.** AC: Swissprot accession code. ID: Uniprot identifier. Individual scores were calculated as the product of the mean spectral count and the 'grp' sequence coverage extracted from Table S4 in this file.

**Table S10. Gene copy numbers of the 11 Ph+ ALL disease genes as reported in the Cancer Cell Line Encyclopedia (CCLE).**

**Table S11. Distances between each specific drug-binding protein and the deleted disease nodes within the Ph+ ALL disease-modified PPI network.** AC: Swissprot accession code. ID: Uniprot identifier. 'NA' indicates proteins that were not represented in any PPI database and were therefore not mapped onto the network.

**Table S12. Expression analysis of BTK, LYN, ILK and TEC by qPCR in individual Ph+ ALL patient samples and cell lines.**

### **Structural characterization of coupleable drug analogues**

#### pc-Nilotinib

M = 587.59 g/mol ( $C_{31}H_{28}F_3N_7O_2$ )

LC/MS Purity: 99%

MS (pos.-ESI)  $m/z$  588.0  $[M+H]^+$  (66), 294.6  $[M+2H]^{2+}$  (100).

$^1H$ -NMR (400 MHz,  $CD_3OD$ ):  $\delta$  9.09 (bs, 1H), 8.55 (s, 1H), 8.50 (s, 1H), 8.49 (d, 1H), 8.46 (s, 1H), 8.25 (s, 1H), 8.13 (s, 1H), 8.11 (s, 1H), 7.71 (d, 1H), 7.61 (s, 1H), 7.43 (d, 1H), 7.41 (d, 1H), 7.37 (s, 1H), 3.52 (t, 2H), 2.81 (t, 2H), 2.43 (s, 3H), 2.27 (s, 3H), 1.85 (m, 2H).

#### c-Dasatinib

M = 487.02 g/mol ( $C_{22}H_{27}ClN_8OS$ )

LC/MS Purity: 96%

MS (pos.-ESI)  $m/z$  487.3/489.2  $[M+H]^+$  (100/35).

$^1H$ -NMR (400 MHz,  $CD_3OD$ ):  $\delta$  8.19 (s, 1H), 7.35 (dd, 1H), 7.26-7.22 (m, 1H), 7.24-7.20 (m, 1H), 6.34 (s, 1H), 3.94 (b, 4H), 3.35-3.29 (m, 2H), 3.21-3.14 (m, 6H), 2.54 (s, 3H), 2.31 (s, 3H).

#### c-Bosutinib

M = 696.93 g/mol ( $C_{29}H_{36}Cl_2N_6O_3 \cdot 3HCl$ ), free base 587.54 g/mol ( $C_{29}H_{36}Cl_2N_6O_3$ )

LC/MS Purity: 96%

MS (pos.-ESI)  $m/z$  587.1/589.0  $[M+H]^+$  (56/41).

$^1\text{H-NMR}$  (300 MHz, DMSO- $d_6$ ):  $\delta$  12 (bs, 1H), 11.15 (bs, 1H), 8.97 (s, 1H), 8.31 (s, 1H), 8.03 (bs, 2H), 7.84 (s, 1H), 7.59 (s, 1H), 7.51 (s, 1H), 6.1-5.1 (b, 2H), 4.34 (t, 2H), 4.04 (s, 3H), 3.88 (s, 3H), 3.66 (bs, 6H), 3.56 (bs, 4H), 3.35 (m, 2H), 2.81 (m, 2H), 2.36 (bs, 2H), 1.81 (bs, 2H), 1.64 (bs, 2H).

pc-Bafetinib

M = 633.71 g/mol ( $\text{C}_{34}\text{H}_{38}\text{F}_3\text{N}_7\text{O}_2$ )

LC/MS Purity: 96%

MS (pos.-ESI)  $m/z$  634.3  $[M+H]^+$  (37), 317.7  $[M+2H]^{2+}$  (100).

$^1\text{H-NMR}$  (400 MHz,  $\text{CDCl}_3$ ):  $\delta$  9.00 (d, 1H), 8.68 (bs, 1H), 8.53 (d, 1H), 8.50 (d, 1H), 8.40 (bs, 1H), 8.16 (s, 1H), 8.07 (s, 1H)\*, 8.02 (d, 1H), 7.92 (d, 1H), 7.28-7.20 (m, 2H), 7.18 (d, 1H), 7.06 (s, 1H)\*, 3.82 (dd, 1H), 3.71 (dd, 1H), 3.47 (m, 2H), 2.81 (m, 1H), 2.79 (m, 2H), 2.73-2.60 (m, 3H), 2.48 (m, 1H), 2.29 (s, 3H), 2.17 (s, 6H), 2.05-1.90 (m, 1H), 1.88-1.75 (m, 3H).

### A Nilotinib

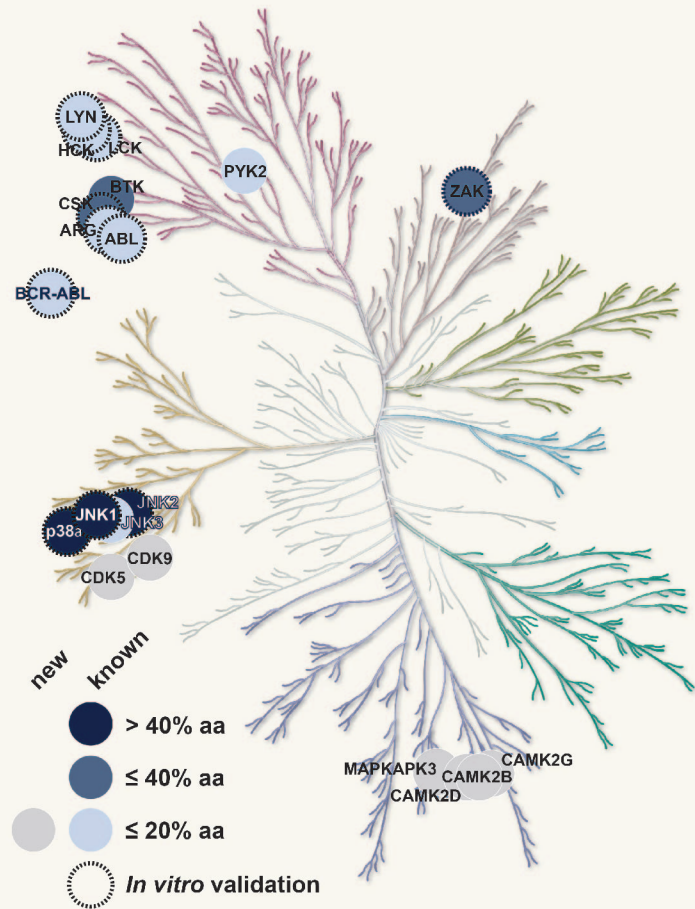

### B Dasatinib

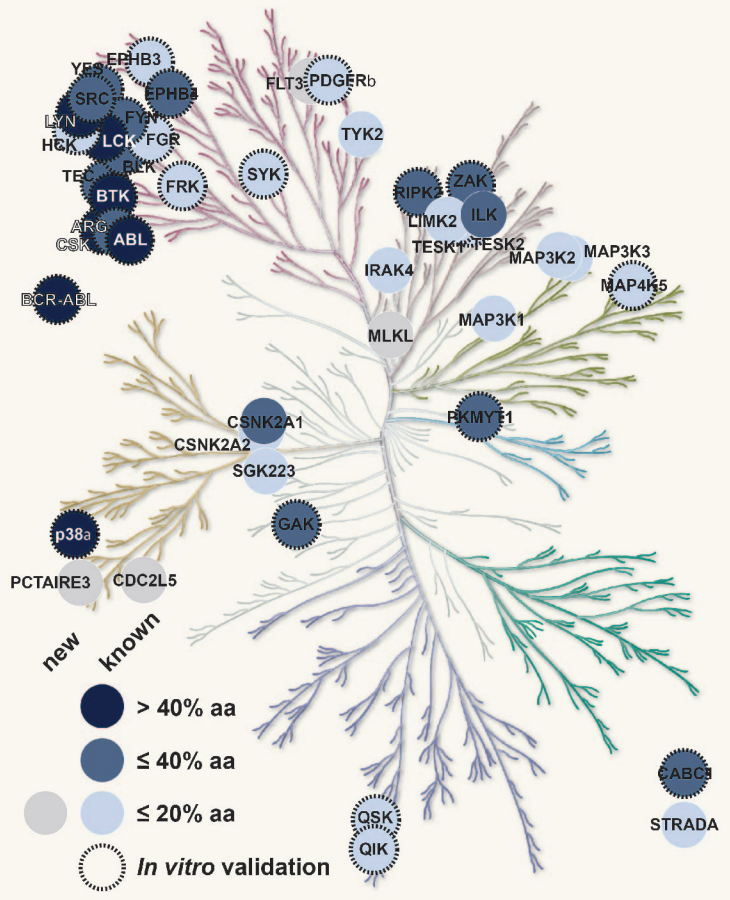

### C Bosutinib

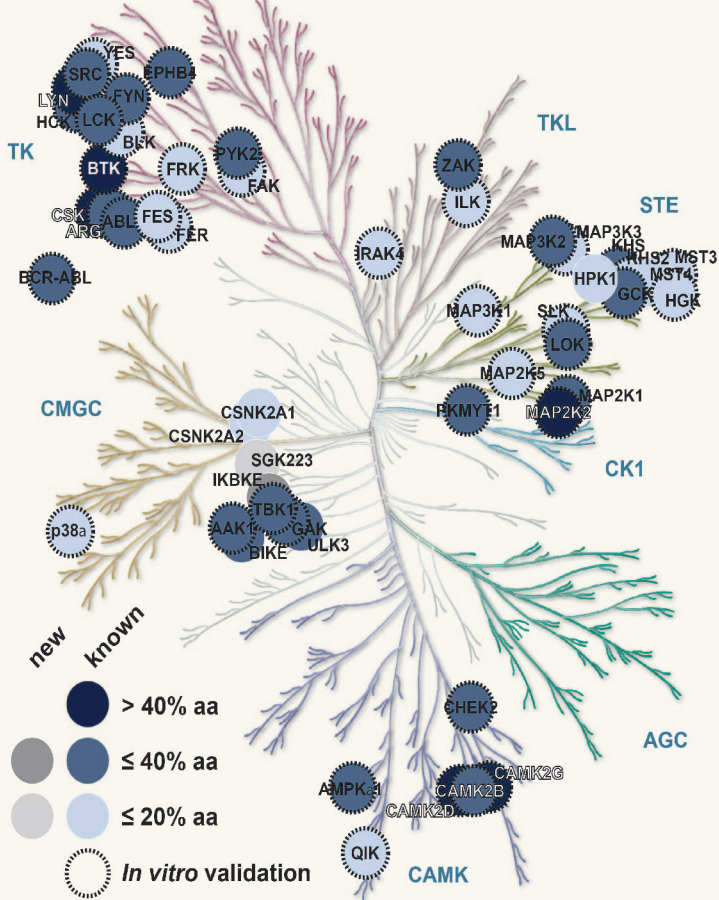

### D Bafetinib

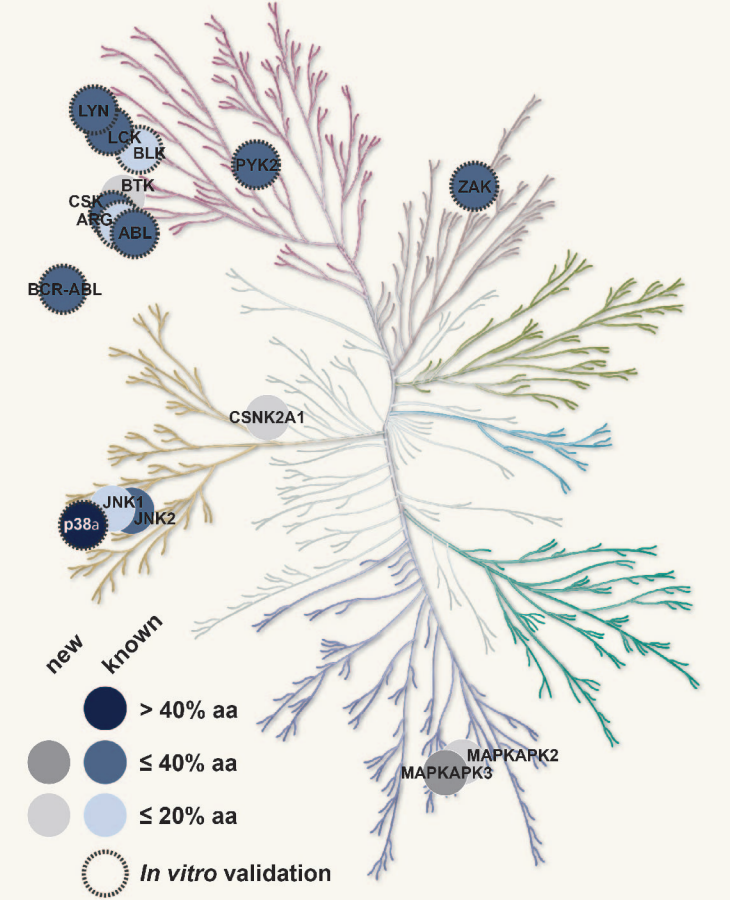

# Rix et al., Supplementary Figure 3

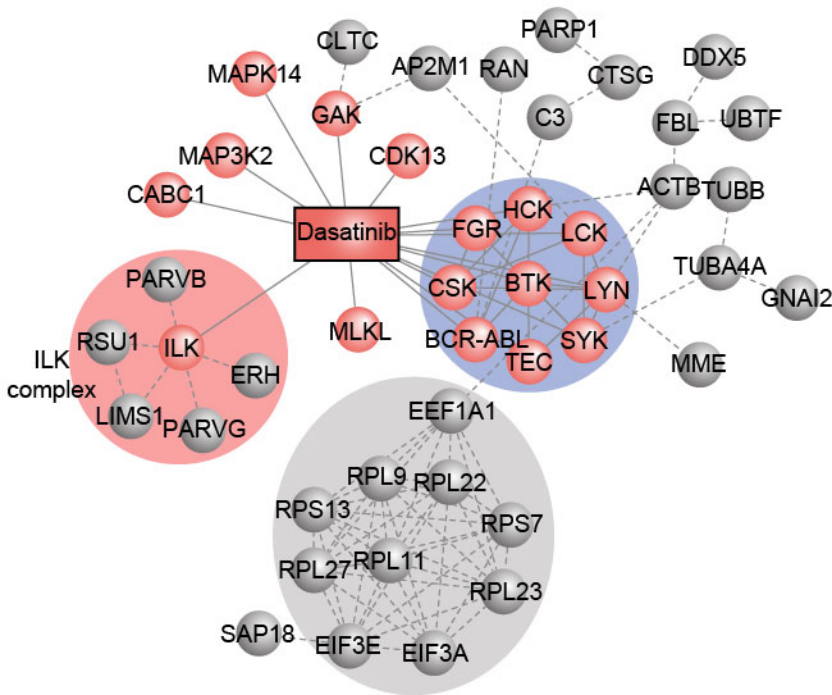



### Effect of Imatinib on <sup>3</sup>H-Thymidine Incorporation by BV173 Cells

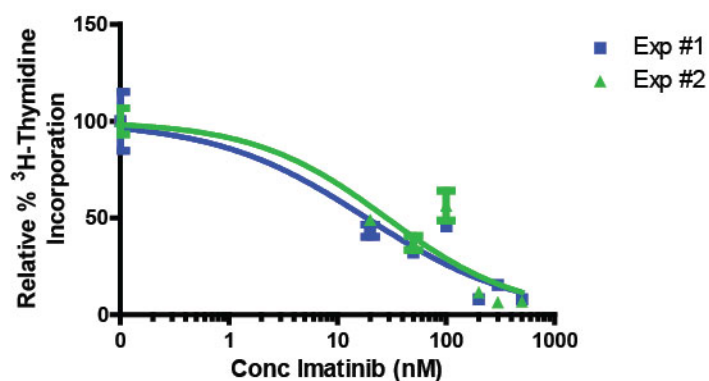

|      | Exp #1 | Exp #2 |
|------|--------|--------|
| EC50 | 18.50  | 28.41  |

### Effect of Nilotinib on <sup>3</sup>H-Thymidine Incorporation by BV173 Cells

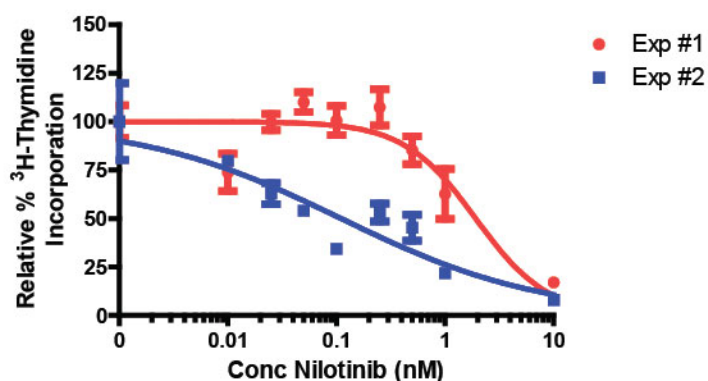

|      | Exp #1 | Exp #2 |
|------|--------|--------|
| EC50 | 1.921  | 0.1108 |

### Effect of Dasatinib on <sup>3</sup>H-Thymidine Incorporation by BV173 Cells

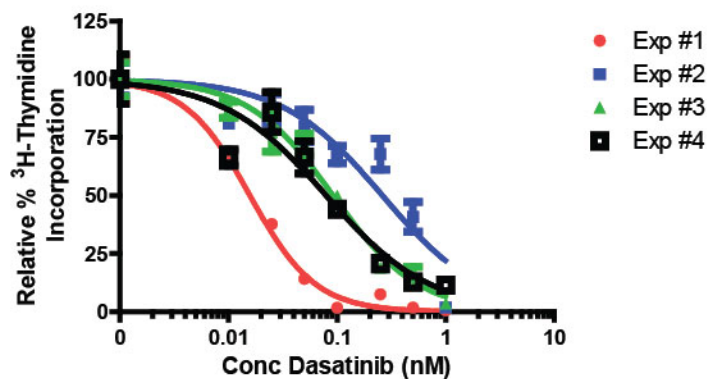

|      | Exp #1  | Exp #2 | Exp #3  | Exp #4  |
|------|---------|--------|---------|---------|
| EC50 | 0.01577 | 0.2615 | 0.09191 | 0.07953 |

### Effect of Bosutinib on <sup>3</sup>H-Thymidine Incorporation by BV173 Cells

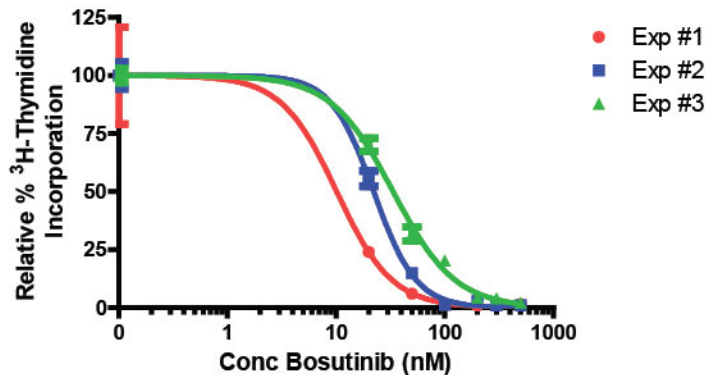

|      | Exp #1 | Exp #2 | Exp #3 |
|------|--------|--------|--------|
| EC50 | 10.14  | 22.20  | 33.55  |

### Effect of Bafetinib on <sup>3</sup>H-Thymidine Incorporation by BV173 Cells

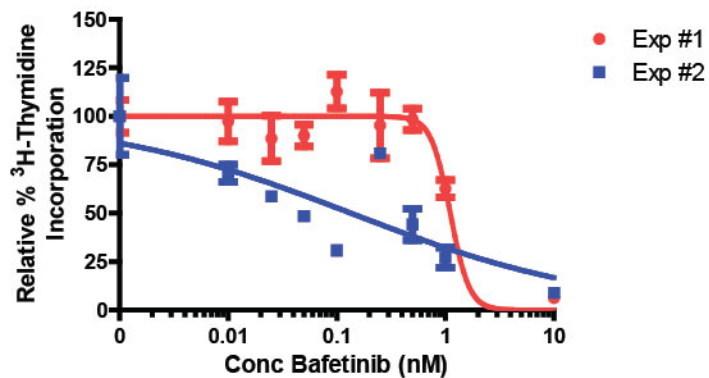

|      | Exp #1 | Exp #2 |
|------|--------|--------|
| EC50 | 1.111  | 0.1355 |



### Effect of Imatinib on <sup>3</sup>H-Thymidine Incorporation by Z119 Cells

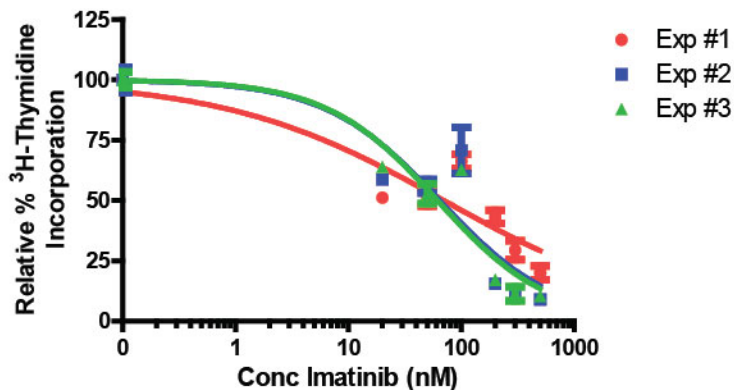

|      | Exp #1 | Exp #2 | Exp #3 |
|------|--------|--------|--------|
| EC50 | 69.98  | 64.23  | 61.44  |

### Effect of Nilotinib on <sup>3</sup>H-Thymidine Incorporation by Z119 Cells

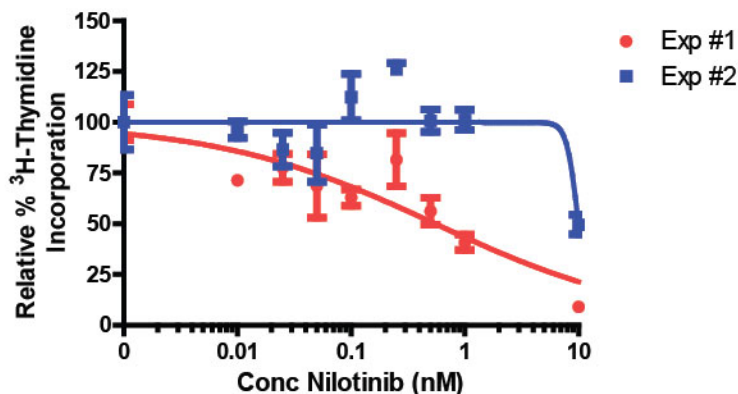

|      | Exp #1 | Exp #2 |
|------|--------|--------|
| EC50 | 0.5506 | ~9.982 |

### Effect of Dasatinib on <sup>3</sup>H-Thymidine Incorporation by Z119 Cells

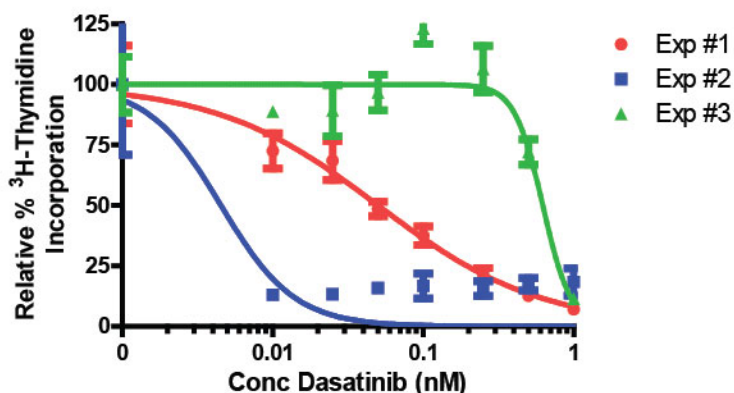

|      | Exp #1  | Exp #2   | Exp #3 |
|------|---------|----------|--------|
| EC50 | 0.05004 | 0.004533 | 0.6217 |

### Effect of Bosutinib on <sup>3</sup>H-Thymidine Incorporation by Z119 Cells

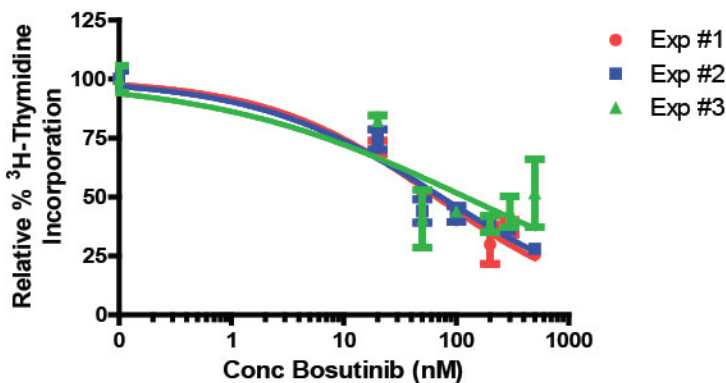

|      | Exp #1 | Exp #2 | Exp #3 |
|------|--------|--------|--------|
| EC50 | 66.46  | 73.47  | 120.8  |

### Effect of Bafetinib on <sup>3</sup>H-Thymidine Incorporation by Z119 Cells

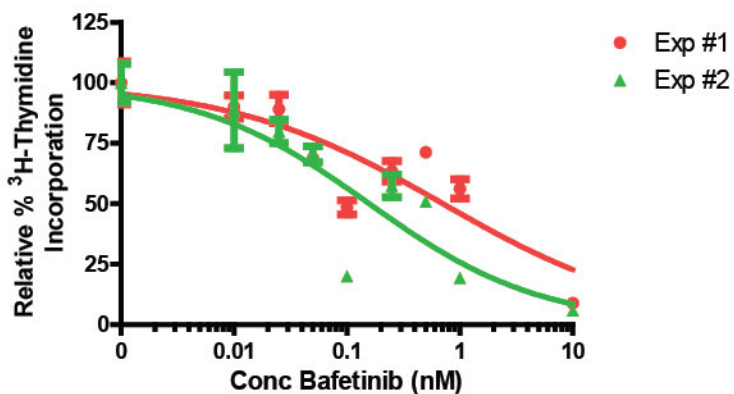

|      | Exp #1 | Exp #2 |
|------|--------|--------|
| EC50 | 0.9293 | 0.2781 |

**Effect of Imatinib on <sup>3</sup>H-Thymidine Incorporation by SUP-B15 Cells**

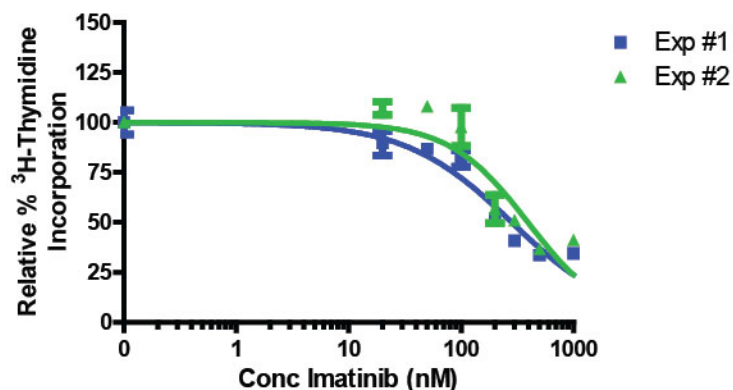

|      | Exp #1 | Exp #2 |
|------|--------|--------|
| EC50 | 282.5  | 394.2  |

**Effect of Nilotinib on <sup>3</sup>H-Thymidine Incorporation by SUP-B15 Cells**

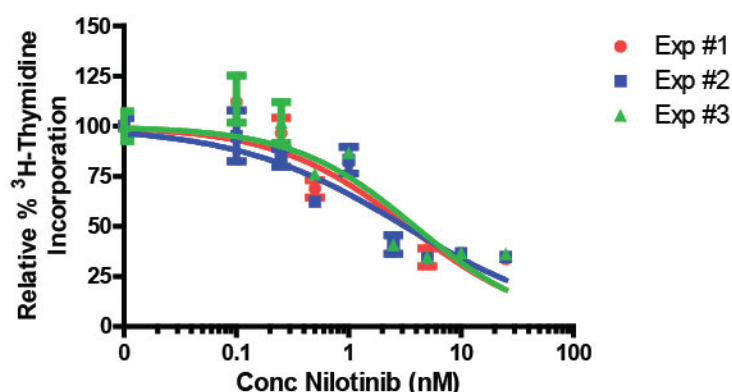

|      | Exp #1 | Exp #2 | Exp #3 |
|------|--------|--------|--------|
| EC50 | 3.367  | 3.193  | 3.901  |

**Effect of Dasatinib on <sup>3</sup>H-Thymidine Incorporation by SUP-B15 Cells**

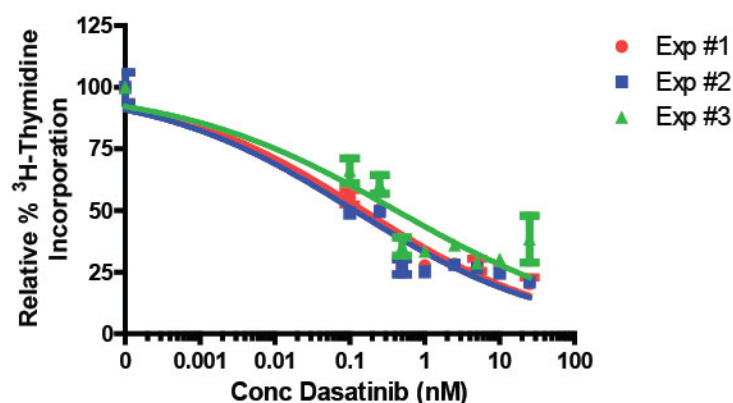

|      | Exp #1 | Exp #2 | Exp #3 |
|------|--------|--------|--------|
| EC50 | 0.2619 | 0.2158 | 0.5736 |

**Effect of Bosutinib on <sup>3</sup>H-Thymidine Incorporation by SUP-B15 Cells**

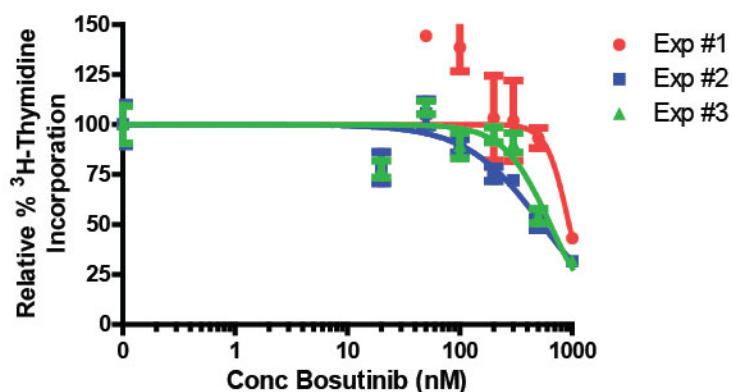

|      | Exp #1 | Exp #2 | Exp #3 |
|------|--------|--------|--------|
| EC50 | 939.1  | 541.5  | 638.9  |

**Effect of Bafetinib on <sup>3</sup>H-Thymidine Incorporation by SUP-B15 Cells**

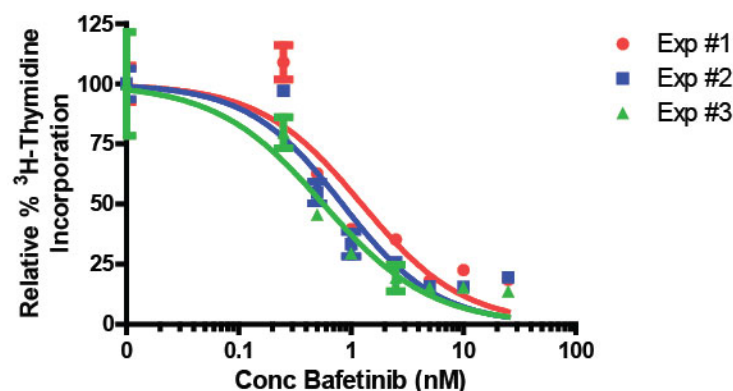

|      | Exp #1 | Exp #2 | Exp #3 |
|------|--------|--------|--------|
| EC50 | 1.246  | 0.8384 | 0.5664 |

# Rix et al., Figure S7

## A BV173

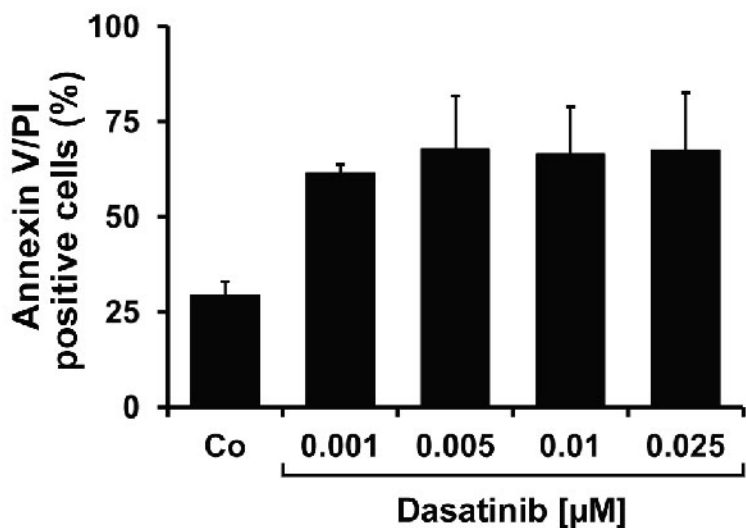

## B Z119

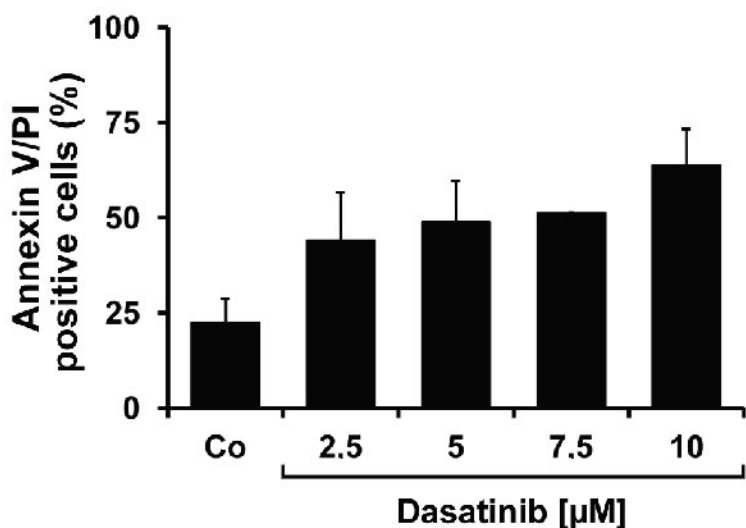

## C

| ED <sub>50</sub> | BV173                | Z119              |
|------------------|----------------------|-------------------|
| Imatinib         | 0.1 $\mu\text{M}$    | >10 $\mu\text{M}$ |
| Nilotinib        | 0.005 $\mu\text{M}$  | >10 $\mu\text{M}$ |
| Dasatinib        | <0.001 $\mu\text{M}$ | 7.5 $\mu\text{M}$ |
| Bosutinib        | 0.1 $\mu\text{M}$    | 2.5 $\mu\text{M}$ |

| <b>Patient</b> | <b>Gender</b> | <b>Age (y)</b> | <b>Diagnosis</b> | <b>BCR-ABL</b> | <b>WBC (G/L)</b> | <b>Hb (g/dL)</b> | <b>Plt (G/L)</b> | <b>Cytogenetics</b>      |
|----------------|---------------|----------------|------------------|----------------|------------------|------------------|------------------|--------------------------|
| 1              | m             | 73             | pre-B-ALL        | y              | 140              | 10               | 19               | 46, XY, t(9;22)(q34;q11) |
| 2              | m             | 39             | c-ALL            | y              | 61.6             | 9.4              | 56               | 46, XY, t(9;22)(q34;q11) |
| 3              | f             | 35             | c-ALL            | y              | 24.72            | 13.1             | 177              | complex                  |
| 4              | f             | 56             | pre-B-ALL        | y              | 2.3              | 7.4              | 86               | 46, XX, t(9;22)(q34;q11) |
| 5              | f             | 55             | c-ALL            | y              | 71.3             | 13.7             | 73               | 46, XX, t(9;22)(q34;q11) |
| 6              | f             | 37             | pre-B-ALL        | y              | 4.4              | 7.6              | 3                | 46, XX                   |

1. Introduction  
2. Methodology  
3. Results  
4. Discussion  
5. Conclusion

6. References  
7. Appendix  
8. Acknowledgments  
9. Author Biographies  
10. Contact Information

11. Declaration of Interest  
12. Funding Source  
13. Data Availability Statement

14. Ethics Statement  
15. Conflicts of Interest

16. Author Contributions  
17. Correspondence

18. Peer Review History  
19. Publication Details

20. Copyright Information  
21. Terms and Conditions

22. Privacy Policy  
23. Contact Us

24. About Us  
25. Services

26. Products  
27. Pricing

28. Quality Assurance  
29. Customer Support

30. Feedback  
31. Testimonials

32. Case Studies  
33. Industry News

34. Press Releases  
35. Media Inquiries

36. Awards and Recognition  
37. Partnerships

38. Collaborations  
39. Future Plans

40. Sustainability  
41. Social Responsibility

42. Environmental Impact  
43. Community Engagement

44. Diversity and Inclusion  
45. Employee Well-being

46. Safety and Security  
47. Risk Management

48. Compliance  
49. Regulatory Updates

50. Industry Trends  
51. Market Analysis

52. Competitive Landscape  
53. Strategic Initiatives

54. Innovation and R&D  
55. Intellectual Property

56. Patent Applications  
57. Trademark Registrations







| <b>Drug</b> | <b>Kinase</b>  | <b>IC<sub>50</sub> [nM]</b> |
|-------------|----------------|-----------------------------|
| Bosutinib   | MAP2K1 (MEK1)  | 2480                        |
| Bosutinib   | MAP2K2 (MEK2)  | 143                         |
| Bosutinib   | MAP3K2 (MEKK2) | 68                          |
| Nilotinib   | MAPK9 (JNK2)   | 12900                       |

1. **Introduction**  
This document provides a comprehensive overview of the project's objectives, scope, and the methodology employed for data analysis. The primary goal is to evaluate the effectiveness of the proposed system in enhancing operational efficiency and reducing costs. The scope of the study is limited to the core processes of the organization, excluding peripheral activities. The methodology involves a combination of qualitative and quantitative techniques, including interviews, surveys, and data mining, to gather and analyze relevant information.

2. **Methodology**  
The research methodology is designed to ensure the reliability and validity of the findings. It consists of several key components: **2.1. Data Collection:** Data is collected through a series of structured interviews with key stakeholders and a survey of employees. **2.2. Data Analysis:** The collected data is analyzed using statistical software to identify trends and correlations. **2.3. Validation:** The results are validated through a series of focus groups and expert reviews to ensure accuracy and relevance.

3. **Results**  
The analysis reveals several significant findings. First, there is a clear correlation between the implementation of the proposed system and an increase in productivity. Second, the system has effectively reduced operational costs, particularly in the areas of resource allocation and waste management. These results suggest that the proposed system is a viable and beneficial solution for the organization.

4. **Conclusion**  
In conclusion, the study demonstrates that the proposed system is highly effective in achieving its intended goals. The findings provide a strong basis for the implementation of the system on a larger scale. Further research is recommended to explore the long-term impacts and potential challenges associated with the system's adoption.

5. **References**  
The following references are cited in this document to provide context and support for the research findings.

6. **Appendix A**  
Appendix A contains supplementary information, including detailed data tables and additional charts that support the main findings of the report.

7. **Appendix B**  
Appendix B provides a detailed breakdown of the system's architecture and the specific components that facilitate its operation.

8. **Appendix C**  
Appendix C includes a list of the interviewees and survey participants, along with their respective roles within the organization.

9. **Appendix D**  
Appendix D contains a glossary of key terms and definitions used throughout the document to ensure clarity and consistency.

10. **Appendix E**  
Appendix E provides a detailed timeline of the project's progress, from the initial planning stages to the final implementation and evaluation.

11. **Appendix F**  
Appendix F includes a list of the software tools and technologies used in the development and analysis of the system.

12. **Appendix G**  
Appendix G contains a list of the organizations and institutions that have provided support and resources for the project.

13. **Appendix H**  
Appendix H includes a list of the authors and their affiliations, along with their contact information for further inquiries.

14. **Appendix I**  
Appendix I contains a list of the organizations and institutions that have provided support and resources for the project.

15. **Appendix J**  
Appendix J includes a list of the authors and their affiliations, along with their contact information for further inquiries.

16. **Appendix K**  
Appendix K contains a list of the organizations and institutions that have provided support and resources for the project.

17. **Appendix L**  
Appendix L includes a list of the authors and their affiliations, along with their contact information for further inquiries.

18. **Appendix M**  
Appendix M contains a list of the organizations and institutions that have provided support and resources for the project.

19. **Appendix N**  
Appendix N includes a list of the authors and their affiliations, along with their contact information for further inquiries.

20. **Appendix O**  
Appendix O contains a list of the organizations and institutions that have provided support and resources for the project.

21. **Appendix P**  
Appendix P includes a list of the authors and their affiliations, along with their contact information for further inquiries.

22. **Appendix Q**  
Appendix Q contains a list of the organizations and institutions that have provided support and resources for the project.

23. **Appendix R**  
Appendix R includes a list of the authors and their affiliations, along with their contact information for further inquiries.

24. **Appendix S**  
Appendix S contains a list of the organizations and institutions that have provided support and resources for the project.

25. **Appendix T**  
Appendix T includes a list of the authors and their affiliations, along with their contact information for further inquiries.

| Item | Value | Item | Value |
|------|-------|------|-------|
| 0    | 0.00  | 100  | 0.00  |
| 1    | 0.00  | 101  | 0.00  |
| 2    | 0.00  | 102  | 0.00  |
| 3    | 0.00  | 103  | 0.00  |
| 4    | 0.00  | 104  | 0.00  |
| 5    | 0.00  | 105  | 0.00  |
| 6    | 0.00  | 106  | 0.00  |
| 7    | 0.00  | 107  | 0.00  |
| 8    | 0.00  | 108  | 0.00  |
| 9    | 0.00  | 109  | 0.00  |
| 10   | 0.00  | 110  | 0.00  |
| 11   | 0.00  | 111  | 0.00  |
| 12   | 0.00  | 112  | 0.00  |
| 13   | 0.00  | 113  | 0.00  |
| 14   | 0.00  | 114  | 0.00  |
| 15   | 0.00  | 115  | 0.00  |
| 16   | 0.00  | 116  | 0.00  |
| 17   | 0.00  | 117  | 0.00  |
| 18   | 0.00  | 118  | 0.00  |
| 19   | 0.00  | 119  | 0.00  |
| 20   | 0.00  | 120  | 0.00  |
| 21   | 0.00  | 121  | 0.00  |
| 22   | 0.00  | 122  | 0.00  |
| 23   | 0.00  | 123  | 0.00  |
| 24   | 0.00  | 124  | 0.00  |
| 25   | 0.00  | 125  | 0.00  |
| 26   | 0.00  | 126  | 0.00  |
| 27   | 0.00  | 127  | 0.00  |
| 28   | 0.00  | 128  | 0.00  |
| 29   | 0.00  | 129  | 0.00  |
| 30   | 0.00  | 130  | 0.00  |
| 31   | 0.00  | 131  | 0.00  |
| 32   | 0.00  | 132  | 0.00  |
| 33   | 0.00  | 133  | 0.00  |
| 34   | 0.00  | 134  | 0.00  |
| 35   | 0.00  | 135  | 0.00  |
| 36   | 0.00  | 136  | 0.00  |
| 37   | 0.00  | 137  | 0.00  |
| 38   | 0.00  | 138  | 0.00  |
| 39   | 0.00  | 139  | 0.00  |
| 40   | 0.00  | 140  | 0.00  |
| 41   | 0.00  | 141  | 0.00  |
| 42   | 0.00  | 142  | 0.00  |
| 43   | 0.00  | 143  | 0.00  |
| 44   | 0.00  | 144  | 0.00  |
| 45   | 0.00  | 145  | 0.00  |
| 46   | 0.00  | 146  | 0.00  |
| 47   | 0.00  | 147  | 0.00  |
| 48   | 0.00  | 148  | 0.00  |
| 49   | 0.00  | 149  | 0.00  |
| 50   | 0.00  | 150  | 0.00  |
| 51   | 0.00  | 151  | 0.00  |
| 52   | 0.00  | 152  | 0.00  |
| 53   | 0.00  | 153  | 0.00  |
| 54   | 0.00  | 154  | 0.00  |
| 55   | 0.00  | 155  | 0.00  |
| 56   | 0.00  | 156  | 0.00  |
| 57   | 0.00  | 157  | 0.00  |
| 58   | 0.00  | 158  | 0.00  |
| 59   | 0.00  | 159  | 0.00  |
| 60   | 0.00  | 160  | 0.00  |
| 61   | 0.00  | 161  | 0.00  |
| 62   | 0.00  | 162  | 0.00  |
| 63   | 0.00  | 163  | 0.00  |
| 64   | 0.00  | 164  | 0.00  |
| 65   | 0.00  | 165  | 0.00  |
| 66   | 0.00  | 166  | 0.00  |
| 67   | 0.00  | 167  | 0.00  |
| 68   | 0.00  | 168  | 0.00  |
| 69   | 0.00  | 169  | 0.00  |
| 70   | 0.00  | 170  | 0.00  |
| 71   | 0.00  | 171  | 0.00  |
| 72   | 0.00  | 172  | 0.00  |
| 73   | 0.00  | 173  | 0.00  |
| 74   | 0.00  | 174  | 0.00  |
| 75   | 0.00  | 175  | 0.00  |
| 76   | 0.00  | 176  | 0.00  |
| 77   | 0.00  | 177  | 0.00  |
| 78   | 0.00  | 178  | 0.00  |
| 79   | 0.00  | 179  | 0.00  |
| 80   | 0.00  | 180  | 0.00  |
| 81   | 0.00  | 181  | 0.00  |
| 82   | 0.00  | 182  | 0.00  |
| 83   | 0.00  | 183  | 0.00  |
| 84   | 0.00  | 184  | 0.00  |
| 85   | 0.00  | 185  | 0.00  |
| 86   | 0.00  | 186  | 0.00  |
| 87   | 0.00  | 187  | 0.00  |
| 88   | 0.00  | 188  | 0.00  |
| 89   | 0.00  | 189  | 0.00  |
| 90   | 0.00  | 190  | 0.00  |
| 91   | 0.00  | 191  | 0.00  |
| 92   | 0.00  | 192  | 0.00  |
| 93   | 0.00  | 193  | 0.00  |
| 94   | 0.00  | 194  | 0.00  |
| 95   | 0.00  | 195  | 0.00  |
| 96   | 0.00  | 196  | 0.00  |
| 97   | 0.00  | 197  | 0.00  |
| 98   | 0.00  | 198  | 0.00  |
| 99   | 0.00  | 199  | 0.00  |

| AC       | ID           | Gene_symbol | Descr                                                                       | Dasatinib score | Bosutinib score | Bafetinib score | Nilotinib score |
|----------|--------------|-------------|-----------------------------------------------------------------------------|-----------------|-----------------|-----------------|-----------------|
| Q2M2I8   | AAK1_HUMAN   | AAK1        | AP2-associated protein kinase 1                                             | 0               | 49.8325         | 0               | 0               |
| Q8I2P0-1 | ABI1_HUMAN   | ABI1        | Abi interactor 1                                                            | 0.9425          | 0.45            | 0               | 0               |
| P00519-1 | ABL1_HUMAN   | ABL1        | Tyrosine-protein kinase ABL1                                                | 68.46           | 37.125          | 10.75           | 0.1725          |
| P42684-1 | ABL2_HUMAN   | ABL2        | Tyrosine-protein kinase ABL2                                                | 22.4025         | 10.1325         | 5.16            | 0               |
| P60709   | ACTB_HUMAN   | ACTB        | Actin, cytoplasmic 1                                                        | 0.525           | 9.45            | 0.7875          | 1.35            |
| P55263-1 | ADK_HUMAN    | ADK         | Adenosine kinase                                                            | 23.54           | 0.0525          | 0               | 0               |
| O95782-1 | AP2A1_HUMAN  | AP2A1       | AP-2 complex subunit alpha-1                                                | 0               | 5.1975          | 0               | 0               |
| Q96CW1-1 | AP2M1_HUMAN  | AP2M1       | AP-2 complex subunit mu                                                     | 0.105           | 0.09            | 0               | 0               |
| bcra1    | bcra1        | BCR-ABL     | BCR-ABL fusion protein                                                      | 135.975         | 79.975          | 24.4375         | 0.27            |
| P51451   | BLK_HUMAN    | BLK         | Tyrosine-protein kinase Blk                                                 | 23.1275         | 7.395           | 0.405           | 0               |
| Q9NSY1-1 | BMP2K_HUMAN  | BMP2K       | BMP-2-inducible protein kinase                                              | 0               | 16.64           | 0               | 0               |
| Q06187   | BTX_HUMAN    | BTX         | Tyrosine-protein kinase BTX                                                 | 488.895         | 393.7375        | 4.37            | 11.7075         |
| Q8WUW1-1 | BRK1_HUMAN   | C3orf10     | Probable protein BRK1                                                       | 1.5725          | 0.5625          | 0               | 0               |
| Q8N60-1  | ADC3_HUMAN   | CABC1       | Chaperone activity of bc1 complex-like, mitochondrial                       | 4.9875          | 0               | 0               | 0               |
| Q13554-3 | KCC2B_HUMAN  | CAMK2B      | Calcium/calmodulin-dependent protein kinase type II subunit beta            | 0               | 40.235          | 0               | 0.09            |
| Q13557-1 | KCC2D_HUMAN  | CAMK2D      | Calcium/calmodulin-dependent protein kinase type II subunit delta           | 0               | 223.02          | 0               | 0.5775          |
| Q13555-3 | KCC2G_HUMAN  | CAMK2G      | Calcium/calmodulin-dependent protein kinase type II subunit gamma           | 0               | 78.435          | 0               | 0.09            |
| Q14004-1 | CDK13_HUMAN  | CDK13       | Cell division protein kinase 13                                             | 0.44            | 0               | 0               | 0               |
| Q00535   | CDK5_HUMAN   | CDK5        | Cell division protein kinase 5                                              | 0               | 0               | 0               | 0.0525          |
| P50750-1 | CDK9_HUMAN   | CDK9        | Cell division protein kinase 9                                              | 0               | 0               | 0               | 1.65            |
| O96017-1 | CHK2_HUMAN   | CHEK2       | Serine/threonine-protein kinase Chk2                                        | 0               | 1.3             | 0               | 0               |
| P41240   | CSK_HUMAN    | CSK         | Tyrosine-protein kinase CSK                                                 | 152.2625        | 50.43           | 5.0625          | 21.3125         |
| P68400   | CSK21_HUMAN  | CSNK2A1     | Casein kinase II subunit alpha                                              | 2.325           | 0.8925          | 0.025           | 0               |
| P19784   | CSK22_HUMAN  | CSNK2A2     | Casein kinase II subunit alpha'                                             | 0.4275          | 0.36            | 0               | 0               |
| P67870   | CSK2B_HUMAN  | CSNK2B      | Casein kinase II subunit beta                                               | 0.225           | 0.27            | 0.1125          | 0               |
| Q96F07-1 | CYFP2_HUMAN  | CYFIP2      | Cytosolic FMR1-interacting protein 2                                        | 0.54            | 0.06            | 0               | 0               |
| P06733-1 | ENO4_HUMAN   | ENO1        | Alpha-enolase                                                               | 0               | 1.485           | 0               | 0.2275          |
| P13929-1 | ENO8_HUMAN   | ENO3        | Beta-enolase                                                                | 0               | 0.21            | 0               | 0.04            |
| P54753   | EPHB3_HUMAN  | EPHB3       | Ephrin type-B receptor 3                                                    | 7.8             | 4.44            | 0               | 0               |
| P54760   | EPHB4_HUMAN  | EPHB4       | Ephrin type-B receptor 4                                                    | 38.88           | 49.9625         | 0               | 0               |
| P22830   | HEMH_HUMAN   | FECH        | Ferrochelatase, mitochondrial                                               | 0               | 0               | 0               | 3.3             |
| P16591   | FER_HUMAN    | FER         | Tyrosine-protein kinase Fer                                                 | 0               | 7.14            | 0               | 0               |
| Q8NFF5-1 | FAD1_HUMAN   | FLAD1       | FAD synthase                                                                | 0               | 0               | 18.655          | 0               |
| P42685   | FRK_HUMAN    | FRK         | Tyrosine-protein kinase FRK                                                 | 1.3575          | 0.6675          | 0               | 0               |
| P06241-2 | FYN_HUMAN    | FYN         | Tyrosine-protein kinase Fyn                                                 | 21.75           | 18.6875         | 0.24            | 0               |
| Q14976   | GAK_HUMAN    | GAK         | Cyclin-G-associated kinase                                                  | 8.625           | 54.1125         | 0               | 0               |
| P04406   | G3P_HUMAN    | GAPDH       | Glyceraldehyde-3-phosphate dehydrogenase                                    | 0.045           | 0.42            | 0               | 0.99            |
| P14136-1 | GFAP_HUMAN   | GFAP        | Glial fibrillary acidic protein                                             | 0.16            | 0.18            | 0.27            | 0.97            |
| Q13588   | GRAP_HUMAN   | GRAP        | GRB2-related adapter protein                                                | 4.4             | 4.2             | 0.375           | 0               |
| P62993-1 | GRB2_HUMAN   | GRB2        | Growth factor receptor-bound protein 2                                      | 44.01           | 46.44           | 19.875          | 0.09            |
| P08631-1 | HCK_HUMAN    | HCK         | Tyrosine-protein kinase HCK                                                 | 11.72           | 16.905          | 0.405           | 0.1725          |
| P10412   | H14_HUMAN    | HIST1H1E    | Histone H1.4                                                                | 0.1125          | 0.0675          | 0.77            | 0.7975          |
| O60814   | H2B1K_HUMAN  | HIST1H2BK   | Histone H2B type 1-K                                                        | 0               | 1.575           | 1.8375          | 4.64            |
| P08107   | HSP71_HUMAN  | HSPA1B      | Heat shock 70 kDa protein 1A/1B                                             | 0.6475          | 1.785           | 0.2975          | 0.6625          |
| P34931   | HSP71L_HUMAN | HSPA1L      | Heat shock 70 kDa protein 1-like                                            | 1               | 1.55            | 0.8             | 1.5             |
| P17066   | HSP76_HUMAN  | HSPA6       | Heat shock 70 kDa protein 6                                                 | 0.6475          | 1.44            | 0.2975          | 0.6625          |
| P04792   | HSPB1_HUMAN  | HSPB1       | Heat shock protein beta-1                                                   | 0.9775          | 2.535           | 0.715           | 1.0075          |
| Q14164   | IKKE_HUMAN   | IKBK        | Inhibitor of nuclear factor kappa-B kinase subunit epsilon                  | 0               | 2.2425          | 0               | 0               |
| Q13418   | ILK_HUMAN    | ILK         | Integrin-linked protein kinase                                              | 40.32           | 0.15            | 0               | 0               |
| O15357-1 | SHIP2_HUMAN  | INPPL1      | Phosphatidylinositol-3,4,5-trisphosphate 5-phosphatase 2                    | 0.49            | 0.48            | 0               | 0               |
| Q9NWZ3   | IRAK4_HUMAN  | IRAK4       | Interleukin-1 receptor-associated kinase 4                                  | 0.0375          | 3.12            | 0               | 0               |
| P06239-1 | LCK_HUMAN    | LCK         | Tyrosine-protein kinase Lck                                                 | 76.0225         | 54.795          | 21.06           | 0.715           |
| P07195   | LDHB_HUMAN   | LDHB        | L-lactate dehydrogenase B chain                                             | 0               | 1.24            | 0.03            | 0               |
| P53671-1 | LIMK2_HUMAN  | LIMK2       | LIM domain kinase 2                                                         | 0.945           | 0               | 0               | 0               |
| P48059   | LIMS1_HUMAN  | LIMS1       | LIM and senescent cell antigen-like-containing domain protein 1             | 28.8            | 0.04            | 0               | 0               |
| Q72417-1 | LIMS2_HUMAN  | LIMS2       | LIM and senescent cell antigen-like-containing domain protein 2             | 5.875           | 0               | 0               | 0               |
| P07948-2 | LYN_HUMAN    | LYN         | Tyrosine-protein kinase Lyn                                                 | 212.3875        | 182.8575        | 25.0575         | 3.7525          |
| Q02750   | MAP2K1_HUMAN | MAP2K1      | Dual specificity mitogen-activated protein kinase kinase 1                  | 0               | 59.5725         | 0               | 0               |
| P36507   | MAP2K2_HUMAN | MAP2K2      | Dual specificity mitogen-activated protein kinase kinase 2                  | 0               | 78.21           | 0               | 0               |
| Q13163-1 | MAP2K5_HUMAN | MAP2K5      | Dual specificity mitogen-activated protein kinase kinase 5                  | 0               | 0.9425          | 0               | 0               |
| Q13223   | MAP3K1_HUMAN | MAP3K1      | Mitogen-activated protein kinase kinase kinase 1                            | 0               | 1.38            | 0               | 0               |
| Q9Y2U5   | MAP3K2_HUMAN | MAP3K2      | Mitogen-activated protein kinase kinase kinase 2                            | 0.7             | 19.955          | 0               | 0               |
| Q99759-1 | MAP3K3_HUMAN | MAP3K3      | Mitogen-activated protein kinase kinase kinase 3                            | 0.45            | 6.76            | 0               | 0               |
| Q92918   | MAP4K1_HUMAN | MAP4K1      | Mitogen-activated protein kinase kinase kinase kinase 1                     | 0               | 4.68            | 0               | 0               |
| Q12851   | MAP4K2_HUMAN | MAP4K2      | Mitogen-activated protein kinase kinase kinase kinase 2                     | 0               | 24.5            | 0               | 0               |
| Q8IVH8-1 | MAP4K3_HUMAN | MAP4K3      | Mitogen-activated protein kinase kinase kinase kinase 3                     | 0               | 0.1             | 0               | 0               |
| O95819-1 | MAP4K4_HUMAN | MAP4K4      | Mitogen-activated protein kinase kinase kinase kinase 4                     | 0               | 0.35            | 0               | 0               |
| Q9Y4K4   | MAP4K5_HUMAN | MAP4K5      | Mitogen-activated protein kinase kinase kinase kinase 5                     | 4               | 31.7625         | 0               | 0               |
| P53779-1 | MAPK10_HUMAN | MAPK10      | Mitogen-activated protein kinase 10                                         | 0               | 0               | 3.29            | 13.5            |
| Q16539-1 | MAPK14_HUMAN | MAPK14      | Mitogen-activated protein kinase 14                                         | 37.56           | 0               | 78.6675         | 76.8            |
| P45983-3 | MAPK8_HUMAN  | MAPK8       | Mitogen-activated protein kinase 8                                          | 0               | 0               | 5.58            | 55.3            |
| P45984-1 | MAPK9_HUMAN  | MAPK9       | Mitogen-activated protein kinase 9                                          | 0               | 0               | 13.98           | 45.6875         |
| P49137-1 | MAPK2_HUMAN  | MAPKAP2     | MAP kinase-activated protein kinase 2                                       | 0               | 0               | 0.06            | 0               |
| Q16644   | MAPK3_HUMAN  | MAPKAP3     | MAP kinase-activated protein kinase 3                                       | 0               | 0               | 3.3925          | 0.275           |
| Q9NYL2-2 | MLTK_HUMAN   | MLTK        | Mitogen-activated protein kinase kinase kinase MLT                          | 18.81           | 20.8            | 36.9075         | 21.6            |
| Q9P289   | MST4_HUMAN   | MST4        | Serine/threonine-protein kinase MST4                                        | 0               | 2.55            | 0               | 0               |
| P60660-1 | MYL6_HUMAN   | MYL6        | Myosin light polypeptide 6                                                  | 0               | 0               | 0.45            | 0.15            |
| P16083   | NQO2_HUMAN   | NQO2        | Ribosylidihydroxynicotinamide dehydrogenase [quinone]                       | 0               | 0               | 1.0625          | 0               |
| Q9UKK9   | NUDT5_HUMAN  | NUDT5       | ADP-sugar pyrophosphatase                                                   | 3.2625          | 0               | 0               | 0               |
| Q9NWQ8   | PAG1_HUMAN   | PAG1        | Phosphoprotein associated with glycosphingolipid-enriched microdomains 1    | 2.405           | 0.22            | 0               | 0               |
| Q9HBI0-1 | PARVG_HUMAN  | PARVG       | Gamma-parvin                                                                | 51.92           | 1.3175          | 0               | 0               |
| Q9BUL8   | PDC10_HUMAN  | PDCD10      | Programmed cell death protein 10                                            | 0               | 0.6875          | 0               | 0               |
| P09619   | PGFRB_HUMAN  | PDGFRB      | Beta-type platelet-derived growth factor receptor                           | 8.04            | 0               | 0               | 0               |
| Q99640   | PMY1_HUMAN   | PKMYT1      | Membrane-associated tyrosine- and threonine-specific cdc2-inhibitory kinase | 4.03            | 5.58            | 0               | 0               |
| Q06203   | PURI_HUMAN   | PPAT        | Amidophosphoribosyltransferase                                              | 16.96           | 0               | 0               | 0               |
| P23284   | PPIB_HUMAN   | PPIB        | Peptidyl-prolyl cis-trans isomerase B                                       | 0.045           | 0.405           | 1.35            | 0.69            |
| Q13131-1 | PRKA1_HUMAN  | PRKA1       | 5'-AMP-activated protein kinase catalytic subunit alpha-1                   | 0               | 4.23            | 0               | 0               |
| Q05397-1 | FAK1_HUMAN   | PTK2        | Focal adhesion kinase 1                                                     | 0               | 8.4575          | 0               | 0               |
| Q14289-2 | FAK2_HUMAN   | PTK2B       | Protein-tyrosine kinase 2-beta                                              | 0               | 6.93            | 16.125          | 1.82            |
| O43353-1 | RIPK2_HUMAN  | RIPK2       | Receptor-interacting serine/threonine-protein kinase 2                      | 29.785          | 0               | 0               | 0               |
| Q15404   | RSU1_HUMAN   | RSU1        | Ras suppressor protein 1                                                    | 54.52           | 0.5625          | 0               | 0               |
| P31947-1 | 1433S_HUMAN  | SFN         | 14-3-3 protein sigma                                                        | 1.7775          | 1.62            | 0.495           | 0.03            |
| Q86V5    | SG223_HUMAN  | SGK223      | Tyrosine-protein kinase Sgk223                                              | 1.7875          | 0.2975          | 0               | 0               |
| Q9H0K1   | SIK2_HUMAN   | SIK2        | Serine/threonine-protein kinase SIK2                                        | 1.7625          | 0.55            | 0               | 0               |
| Q9H2G2-1 | SLK_HUMAN    | SLK         | STE20-like serine/threonine-protein kinase                                  | 0               | 5.58            | 0               | 0               |
| P12931-1 | SRC_HUMAN    | SRC         | Proto-oncogene tyrosine-protein kinase Src                                  | 9.4875          | 5.985           | 0               | 0               |
| O94804   | STK10_HUMAN  | STK10       | Serine/threonine-protein kinase 10                                          | 0               | 30.225          | 0               | 0               |
| Q7RTN6-1 | STRAA_HUMAN  | STRADA      | STE20-related kinase adapter protein alpha                                  | 0.03            | 0               | 0               | 0               |
| P53999   | TCP4_HUMAN   | SUB1        | Activated RNA polymerase II transcriptional coactivator p15                 | 6.65            | 3.01            | 5.67            | 7.21            |
| Q9UHD2   | TBK1_HUMAN   | TBK1        | Serine/threonine-protein kinase TBK1                                        | 0               | 6.045           | 0               | 0               |
| P42680   | TEC_HUMAN    | TEC         | Tyrosine-protein kinase Tec                                                 | 1.47            | 0               | 0               | 0               |
| Q15569   | TESK1_HUMAN  | TESK1       | Dual specificity testis-specific protein kinase 1                           | 0.42            | 0               | 0               | 0               |
| Q71U36   | TBA1A_HUMAN  | TUBA1A      | Tubulin alpha-1A chain                                                      | 19.3875         | 29.07           | 16.74           | 21.6975         |
| P68363   | TBA1B_HUMAN  | TUBA1B      | Tubulin alpha-1B chain                                                      | 21.96           | 30.4            | 16.92           | 24.66           |
| Q9BQE3   | TBA1C_HUMAN  | TUBA1C      | Tubulin alpha-1C chain                                                      | 19.47           | 29.26           | 16.74           | 23.85           |
| P49411   | EFTU_HUMAN   | TUFM        | Elongation factor Tu, mitochondrial                                         | 0               | 0.675           | 0               | 0               |
| P29597   | TYK2_HUMAN   | TYK2        | Non-receptor tyrosine-protein kinase TYK2                                   | 0.02            | 0               | 0               | 0               |
| Q8TF42   | UB53B_HUMAN  | UBASH3B     | Ubiquitin-associated and SH3 domain-containing protein B                    | 0.55            | 0.1575          | 0               | 0               |
| Q6PHR2-1 | ULK3_HUMAN   | ULK3        | Serine/threonine-protein kinase ULK3                                        | 0               | 7.9825          | 0               | 0               |
| Q13432-1 | U119A_HUMAN  | UNC119      | Protein unc-119 homolog A                                                   | 1.5             | 1.92            | 0.7             | 0               |
| P07947   | YES_HUMAN    | YES1        | Proto-oncogene tyrosine-protein kinase Yes                                  | 22.815          | 10.3125         | 0.24            | 0               |
| P31946-1 | 1433B_HUMAN  | YWHA8       | 14-3-3 protein beta/alpha                                                   | 8.4975          | 10.01           | 1.75            | 0.035           |
| P62258   | 1433E_HUMAN  | YWHA8       | 14-3-3 protein epsilon                                                      | 10.44           | 11.7            | 5.28            | 0.4375          |
| P61981   | 1433G_HUMAN  | YWHA8       | 14-3-3 protein gamma                                                        | 18.815          | 16.56           | 5.3475          | 1.2             |
| Q04917   | 1433F_HUMAN  | YWHA8       | 14-3-3 protein eta                                                          | 4.5125          | 4.4175          | 2.2875          | 0.035           |
| P27348   | 1433T_HUMAN  | YWHAQ       | 14-3-3 protein theta                                                        | 9.9             | 9.72            | 3.78            | 0.1925          |
| P63104   | 1433Z_HUMAN  | YWHAZ       | 14-3-3 protein zeta/delta                                                   | 26.04           | 29.37           | 6.545           | 2.21            |

| AC       | ID           | Gene_symbol | Descr                                                                       | Dasatinib score | Bosutinib score | Bafetinib score | Nilotinib score |
|----------|--------------|-------------|-----------------------------------------------------------------------------|-----------------|-----------------|-----------------|-----------------|
| Q2M2I8   | AAK1_HUMAN   | AAK1        | AP2-associated protein kinase 1                                             | 0               | 42.352          | 0               | 0               |
| P42684-1 | ABL2_HUMAN   | ABL2        | Tyrosine-protein kinase ABL2                                                | 4.424           | 1.0242          | 0.11            | 0               |
| P60709   | ACTB_HUMAN   | ACTB        | Actin, cytoplasmic 1                                                        | 5.1875          | 3.024           | 3.08            | 3.3             |
| P68032   | ACTC_HUMAN   | ACTC1       | Actin, alpha cardiac muscle 1                                               | 2.655           | 1.3325          | 1.182           | 1.54            |
| P55263-1 | ADK_HUMAN    | ADK         | Adenosine kinase                                                            | 12.69           | 1.405           | 0               | 0               |
| O95782-1 | AP2A1_HUMAN  | AP2A1       | AP-2 complex subunit alpha-1                                                | 0               | 4.0964          | 0               | 0               |
| O94973-1 | AP2A2_HUMAN  | AP2A2       | AP-2 complex subunit alpha-2                                                | 0               | 0.46            | 0               | 0               |
| P63010-1 | AP2B1_HUMAN  | AP2B1       | AP-2 complex subunit beta                                                   | 0               | 0.9408          | 0               | 0               |
| Q96CW1-1 | AP2M1_HUMAN  | AP2M1       | AP-2 complex subunit mu                                                     | 0               | 0.3094          | 0               | 0               |
| P53680-1 | AP2S1_HUMAN  | AP2S1       | AP-2 complex subunit sigma                                                  | 0               | 0.3406          | 0               | 0               |
| bcrabl   | bcrabl       | BCR-ABL     | BCR-ABL fusion protein                                                      | 2.6             | 1.262           | 0.025           | 0               |
| P51451   | BLK_HUMAN    | BLK         | Tyrosine-protein kinase Blk                                                 | 6.215           | 0.63            | 0               | 0               |
| Q9NSY1-1 | BMP2K_HUMAN  | BMP2K       | BMP-2-inducible protein kinase                                              | 0               | 9.6912          | 0               | 0               |
| Q06187   | BTK_HUMAN    | BTK         | Tyrosine-protein kinase BTK                                                 | 256.725         | 151.335         | 0               | 0.15            |
| Q8N160-1 | ADCK3_HUMAN  | CABC1       | Chaperone activity of bc1 complex-like, mitochondrial                       | 0.1908          | 0               | 0               | 0               |
| Q13555-1 | KCC2G_HUMAN  | CAMK2G      | Calcium/calmodulin-dependent protein kinase type II subunit gamma           | 0               | 8.025           | 0               | 0               |
| Q14004-1 | CDK13_HUMAN  | CDK13       | Cell division protein kinase 13                                             | 0.0262          | 0               | 0               | 0               |
| Q07002-1 | CDK18_HUMAN  | CDK18       | Cell division protein kinase 18                                             | 0.119           | 0               | 0               | 0               |
| P50750-1 | CDK9_HUMAN   | CDK9        | Cell division protein kinase 9                                              | 0               | 0               | 0               | 0.0434          |
| O96017-1 | CHK2_HUMAN   | CHEK2       | Serine/threonine-protein kinase Chk2                                        | 0               | 0.6048          | 0               | 0               |
| Q16630-1 | CPSF6_HUMAN  | CPSF6       | Cleavage and polyadenylation specificity factor subunit 6                   | 1.032           | 0.7828          | 2.2             | 1.76            |
| Q8N684-1 | CPSF7_HUMAN  | CPSF7       | Cleavage and polyadenylation specificity factor subunit 7                   | 0.35            | 0.05            | 0.04            | 0.212           |
| P41240   | CSK_HUMAN    | CSK         | Tyrosine-protein kinase CSK                                                 | 21.115          | 5.1852          | 0               | 0.843           |
| P27707   | DCK_HUMAN    | DCK         | Deoxycytidine kinase                                                        | 0               | 2.925           | 0               | 0               |
| P59665   | DEF1_HUMAN   | DEFA1B      | Neutrophil defensin 1                                                       | 0               | 0.38            | 0               | 0               |
| P54760   | EPHB4_HUMAN  | EPHB4       | Ephrin type-B receptor 4                                                    | 38.34           | 27.114          | 0               | 0               |
| P22830   | HEMH_HUMAN   | FECH        | Ferrochelatase, mitochondrial                                               | 2.0688          | 2.2475          | 0               | 8.3232          |
| P16591   | FER_HUMAN    | FER         | Tyrosine-protein kinase Fer                                                 | 0               | 0.455           | 0               | 0               |
| P07332   | FES_HUMAN    | FES         | Tyrosine-protein kinase Fes/Fps                                             | 0               | 0.0186          | 0               | 0               |
| Q8NFF5-1 | FAD1_HUMAN   | FLAD1       | FAD synthase                                                                | 0               | 0               | 0.4192          | 0               |
| P36888   | FLT3_HUMAN   | FLT3        | FL cytokine receptor                                                        | 0.0424          | 0               | 0               | 0               |
| P42685   | FRK_HUMAN    | FRK         | Tyrosine-protein kinase FRK                                                 | 0.225           | 0.0486          | 0               | 0               |
| P06241-2 | FYN_HUMAN    | FYN         | Tyrosine-protein kinase Fyn                                                 | 10.295          | 5.076           | 0               | 0               |
| O14976   | GAK_HUMAN    | GAK         | Cyclin-G-associated kinase                                                  | 2.38            | 15.0016         | 0               | 0               |
| P14136-1 | GFAP_HUMAN   | GFAP        | Glial fibrillary acidic protein                                             | 0.0648          | 0.4352          | 0.1448          | 0.12            |
| P62993-1 | GRB2_HUMAN   | GRB2        | Growth factor receptor-bound protein 2                                      | 0.98            | 0.9802          | 0               | 0               |
| P08631-1 | HCK_HUMAN    | HCK         | Tyrosine-protein kinase HCK                                                 | 1.98            | 2.4408          | 0.1386          | 0               |
| P08107   | HSP71_HUMAN  | HSPA1B      | Heat shock 70 kDa protein 1A/1B                                             | 0.225           | 1.4625          | 0.194           | 0.5625          |
| P34931   | HSP71L_HUMAN | HSPA1L      | Heat shock 70 kDa protein 1-like                                            | 0.6096          | 1.238           | 0.52            | 0.495           |
| P17066   | HSP76_HUMAN  | HSPA6       | Heat shock 70 kDa protein 6                                                 | 0.225           | 0.9792          | 0.194           | 0.2925          |
| Q14164   | IKKE_HUMAN   | IKBKE       | Inhibitor of nuclear factor kappa-B kinase subunit epsilon                  | 0               | 0.0375          | 0               | 0               |
| Q13418   | ILK_HUMAN    | ILK         | Integrin-linked protein kinase                                              | 23.679          | 0               | 0               | 0               |
| Q9Y616   | IRAK3_HUMAN  | IRAK3       | Interleukin-1 receptor-associated kinase 3                                  | 0.0434          | 0               | 0               | 0               |
| Q9NWZ3   | IRAK4_HUMAN  | IRAK4       | Interleukin-1 receptor-associated kinase 4                                  | 0.18            | 2.3184          | 0               | 0               |
| P35968   | VGFR2_HUMAN  | KDR         | Vascular endothelial growth factor receptor 2                               | 0.0038          | 0               | 0               | 0               |
| P06239-1 | LCK_HUMAN    | LCK         | Tyrosine-protein kinase Lck                                                 | 18.1368         | 13.28           | 0.72            | 0               |
| P07195   | LDHB_HUMAN   | LDHB        | L-lactate dehydrogenase B chain                                             | 0               | 0.1696          | 0               | 0               |
| Q32P28-1 | P3H1_HUMAN   | LEPRE1      | Prolyl 3-hydroxylase 1                                                      | 0.3504          | 0.06            | 0.5742          | 0.3696          |
| P53671-1 | LIMK2_HUMAN  | LIMK2       | LIM domain kinase 2                                                         | 0.0228          | 0               | 0               | 0               |
| P48059   | LIMS1_HUMAN  | LIMS1       | LIM and senescent cell antigen-like-containing domain protein 1             | 7.7128          | 0               | 0               | 0               |
| Q9Y383-1 | LC7L2_HUMAN  | LUC7L2      | Putative RNA-binding protein Luc7-like 2                                    | 1.05            | 0.9792          | 1               | 1.35            |
| P07948-2 | LYN_HUMAN    | LYN         | Tyrosine-protein kinase Lyn                                                 | 107.328         | 83.3625         | 5.8146          | 0.0152          |
| Q02750   | MP2K1_HUMAN  | MAP2K1      | Dual specificity mitogen-activated protein kinase kinase 1                  | 0               | 27.935          | 0               | 0               |
| P36507   | MP2K2_HUMAN  | MAP2K2      | Dual specificity mitogen-activated protein kinase kinase 2                  | 0               | 38.6952         | 0               | 0               |
| Q13163-1 | MP2K5_HUMAN  | MAP2K5      | Dual specificity mitogen-activated protein kinase kinase 5                  | 0               | 0.0228          | 0               | 0               |
| Q13233   | M3K1_HUMAN   | MAP3K1      | Mitogen-activated protein kinase kinase kinase 1                            | 0               | 0.131           | 0               | 0               |
| Q9Y2U5   | M3K2_HUMAN   | MAP3K2      | Mitogen-activated protein kinase kinase kinase 2                            | 0.21            | 8.8088          | 0               | 0               |
| Q99759-1 | M3K3_HUMAN   | MAP3K3      | Mitogen-activated protein kinase kinase kinase 3                            | 0.0636          | 2.8125          | 0               | 0               |
| Q92918   | M4K1_HUMAN   | MAP4K1      | Mitogen-activated protein kinase kinase kinase kinase 1                     | 0               | 0.9256          | 0               | 0               |
| Q12851   | M4K2_HUMAN   | MAP4K2      | Mitogen-activated protein kinase kinase kinase kinase 2                     | 0               | 1.5808          | 0               | 0               |
| O95819-1 | M4K4_HUMAN   | MAP4K4      | Mitogen-activated protein kinase kinase kinase kinase 4                     | 0               | 0.0375          | 0               | 0               |
| Q9Y4K4   | M4K5_HUMAN   | MAP4K5      | Mitogen-activated protein kinase kinase kinase kinase 5                     | 2.1375          | 9.035           | 0               | 0               |
| Q16539-1 | MK14_HUMAN   | MAPK14      | Mitogen-activated protein kinase 14                                         | 33.8432         | 0.1504          | 29.9934         | 19.3704         |
| P45983-3 | MK08_HUMAN   | MAPK8       | Mitogen-activated protein kinase 8                                          | 0               | 0               | 0.2             | 13.0708         |
| P45984-1 | MK09_HUMAN   | MAPK9       | Mitogen-activated protein kinase 9                                          | 0               | 0               | 2.3544          | 11.767          |
| Q16644   | MAPK3_HUMAN  | MAPKAP3     | MAP kinase-activated protein kinase 3                                       | 0               | 0               | 0.0125          | 0               |
| Q9NYL2-2 | MLTK_HUMAN   | MLTK        | Mitogen-activated protein kinase kinase kinase MLT                          | 13.6648         | 8.8776          | 12.5425         | 5.25            |
| Q9P289   | MST4_HUMAN   | MST4        | Serine/threonine-protein kinase MST4                                        | 0               | 0.9775          | 0               | 0               |
| P35579-1 | MYH9_HUMAN   | MYH9        | Myosin-9                                                                    | 2.2232          | 1.3325          | 3.5784          | 1.9125          |
| O14950   | ML12B_HUMAN  | MYL12B      | Myosin regulatory light chain 12B                                           | 0.48            | 0.78            | 1.38            | 0.57            |
| Q6Z5R9   | YJ005_HUMAN  | NA          | Uncharacterized protein FL45252                                             | 0               | 15.77           | 0               | 0               |
| P16083   | NQO2_HUMAN   | NQO2        | Ribosylidihydroxycotinamide dehydrogenase [quinone]                         | 0               | 0               | 4.7275          | 2.5978          |
| O43809   | CPSF5_HUMAN  | NUDT21      | Cleavage and polyadenylation specificity factor subunit 5                   | 44.928          | 47.203          | 55.497          | 46.41           |
| Q9UKK9   | NUDT5_HUMAN  | NUDT5       | ADP-sugar pyrophosphatase                                                   | 7.0744          | 0               | 0               | 0               |
| P13674-1 | P4HA1_HUMAN  | P4HA1       | Prolyl 4-hydroxylase subunit alpha-1                                        | 1.55            | 1.52            | 3.915           | 2.6325          |
| Q9HB10-1 | PARVG_HUMAN  | PARVG       | Gamma-parvin                                                                | 23.4866         | 1.5912          | 0               | 0               |
| Q9BUL8   | PDC10_HUMAN  | PDCD10      | Programmed cell death protein 10                                            | 0               | 0.855           | 0               | 0               |
| P09619   | PGFRB_HUMAN  | PDGFRB      | Beta-type platelet-derived growth factor receptor                           | 19.845          | 0               | 0               | 0               |
| Q99623   | PHB2_HUMAN   | PHB2        | Prohibitin-2                                                                | 4.0968          | 16.7024         | 5.1675          | 5.679           |
| Q99640   | PMYT1_HUMAN  | PKMYT1      | Membrane-associated tyrosine- and threonine-specific cdc2-inhibitory kinase | 0.1932          | 1.6675          | 0               | 0               |
| ASA3E0   | POTEF_HUMAN  | POTEF       | POTE ankyrin domain family member F                                         | 0.51            | 0.3048          | 0.26            | 0.2048          |
| Q06203   | PUR1_HUMAN   | PPAT        | Amidophosphoribosyltransferase                                              | 16.314          | 0               | 0               | 0               |
| Q13131-1 | AAPK1_HUMAN  | PRKAA1      | 5'-AMP-activated protein kinase catalytic subunit alpha-1                   | 0               | 2.0688          | 0               | 0               |
| Q05397-1 | FAK1_HUMAN   | PTK2        | Focal adhesion kinase 1                                                     | 0               | 0.36            | 0               | 0               |
| Q14289-2 | FAK2_HUMAN   | PTK2B       | Protein-tyrosine kinase 2-beta                                              | 0               | 5.265           | 4.7725          | 0.069           |
| Q96D71-1 | REPS1_HUMAN  | REPS1       | RalBP1-associated Eps domain-containing protein 1                           | 0               | 0.4268          | 0               | 0               |
| O43353-1 | RIPK2_HUMAN  | RIPK2       | Receptor-interacting serine/threonine-protein kinase 2                      | 5.8125          | 0               | 0               | 0               |
| Q15404   | RSU1_HUMAN   | RSU1        | Ras suppressor protein 1                                                    | 30.535          | 0.2484          | 0               | 0               |
| P31947-1 | 14335_HUMAN  | SFN         | 14-3-3 protein sigma                                                        | 0.3708          | 0.6975          | 0.0528          | 0               |
| Q9H0K1   | SIK2_HUMAN   | SIK2        | Serine/threonine-protein kinase SIK2                                        | 0.0372          | 0.005           | 0               | 0               |
| Q9Y2K2-1 | SIK3_HUMAN   | SIK3        | Serine/threonine-protein kinase SIK3                                        | 0.106           | 0               | 0               | 0               |
| Q9H2G2-1 | SLK_HUMAN    | SLK         | STE20-like serine/threonine-protein kinase                                  | 0               | 2.3856          | 0               | 0               |
| P12931-1 | SRC_HUMAN    | SRC         | Proto-oncogene tyrosine-protein kinase Src                                  | 4.68            | 2.3028          | 0               | 0               |
| O94804   | STK10_HUMAN  | STK10       | Serine/threonine-protein kinase 10                                          | 0               | 10.6375         | 0               | 0               |
| Q9Y6E0-1 | STK24_HUMAN  | STK24       | Serine/threonine-protein kinase 24                                          | 0               | 0.26            | 0               | 0               |
| Q9UHD2   | TBK1_HUMAN   | TBK1        | Serine/threonine-protein kinase TBK1                                        | 0               | 3.5088          | 0               | 0               |
| P42680   | TEC_HUMAN    | TEC         | Tyrosine-protein kinase Tec                                                 | 8.7348          | 0               | 0               | 0               |
| Q96553-1 | TESK2_HUMAN  | TESK2       | Dual specificity testis-specific protein kinase 2                           | 0.0828          | 0               | 0               | 0               |
| P49411   | EFTU_HUMAN   | TUFM        | Elongation factor Tu, mitochondrial                                         | 0               | 2.8875          | 0               | 0               |
| P26368-1 | U2AF2_HUMAN  | U2AF2       | Splicing factor U2AF 65 kDa subunit                                         | 1.36            | 1.5392          | 2.8864          | 2.576           |
| Q6PHR2-1 | ULK3_HUMAN   | ULK3        | Serine/threonine-protein kinase ULK3                                        | 0               | 1.155           | 0               | 0               |
| Q13432-1 | U119A_HUMAN  | UNC119      | Protein unc-119 homolog A                                                   | 0.48            | 0.64            | 0               | 0               |
| P07947   | YES_HUMAN    | YES1        | Proto-oncogene tyrosine-protein kinase Yes                                  | 11.1302         | 4.5684          | 0               | 0               |
| P31946-1 | 1433B_HUMAN  | YWHAB       | 14-3-3 protein beta/alpha                                                   | 1.05            | 2.0688          | 0.0616          | 0               |
| P62258   | 1433E_HUMAN  | YWHAE       | 14-3-3 protein epsilon                                                      | 3.9928          | 7.6518          | 0.45            | 0.0875          |
| P61981   | 1433G_HUMAN  | YWHAG       | 14-3-3 protein gamma                                                        | 3.4             | 5.3992          | 0.5792          | 0.1242          |
| Q04917   | 1433F_HUMAN  | YWHAH       | 14-3-3 protein eta                                                          | 1.032           | 1.725           | 0.0616          | 0               |
| P27348   | 1433T_HUMAN  | YWHAQ       | 14-3-3 protein theta                                                        | 2.2736          | 3.6828          | 0.3196          | 0.06            |
| P63104   | 1433Z_HUMAN  | YWHAZ       | 14-3-3 protein zeta/delta                                                   | 4.165           | 9.5786          | 0.7875          | 0.315           |

| <b>Cell Line</b> | <b>IKZF1</b> | <b>CDKN2A</b> | <b>PAX5</b> | <b>C20orf94</b> | <b>RB1</b> | <b>MEF2C</b> | <b>EBF1</b> | <b>BTG1</b> | <b>DLEU2</b> | <b>FHIT</b> | <b>ETV6</b> |
|------------------|--------------|---------------|-------------|-----------------|------------|--------------|-------------|-------------|--------------|-------------|-------------|
| BV-173           | -5.28        | -3.0816       | 0.1053      | -0.047          | 0.0765     | 0.012        | 0.2693      | 0.0036      | 0.0765       | 0.1211      | 0.0182      |
| Z-119            | N/A          | N/A           | N/A         | N/A             | N/A        | N/A          | N/A         | N/A         | N/A          | N/A         | N/A         |
| SUP-B15          | -0.8345      | -2.2783       | -0.8556     | -4.0348         | 0.0687     | -0.0184      | 0.0457      | -0.9328     | 0.0687       | 0.0612      | 0.0158      |





mRNA levels relative to ABL

| <b>Patient</b> | <b>BTK</b> | <b>LYN</b> | <b>ILK</b> | <b>TEC</b> |
|----------------|------------|------------|------------|------------|
| 1              | 6.68       | 3.61       | 4.40       | 0.51       |
| 2              | 6.44       | 1.35       | 6.77       | 0.39       |
| 3              | 5.15       | 1.86       | 11.67      | 0.24       |
| 4              | 11.55      | 6.63       | 5.48       | 1.51       |
| 5              | 8.22       | 1.57       | 17.98      | 0.37       |
| 6              | 5.37       | 3.42       | 8.83       | 0.25       |

mRNA levels relative to ABL

| <b>Cell Line</b> | <b>BTK</b> | <b>LYN</b> | <b>ILK</b> | <b>TEC</b> |
|------------------|------------|------------|------------|------------|
| BV-173           | 1.57       | 1.24       | 0.45       | 0.01       |
| Z-119            | 11.52      | 7.74       | 2.85       | 0.42       |
| SUP-B15          | 3.52       | 1.03       | 2.55       | 0.17       |
